# Supplementary material for: Pro-inflammatory hepatic macrophages generate ROS through NADPH oxidase 2 via endocytosis of monomeric TLR4–MD2 complex
Source: Nat Commun. 2017 Dec 21;8:2247. doi: 10.1038/s41467-017-02325-2 (PMC5740170; doi:10.1038/s41467-017-02325-2)
Supplement: Supplementary file 1 — Supplementary Information [file 41467_2017_2325_MOESM1_ESM.pdf]

## Supplementary Information

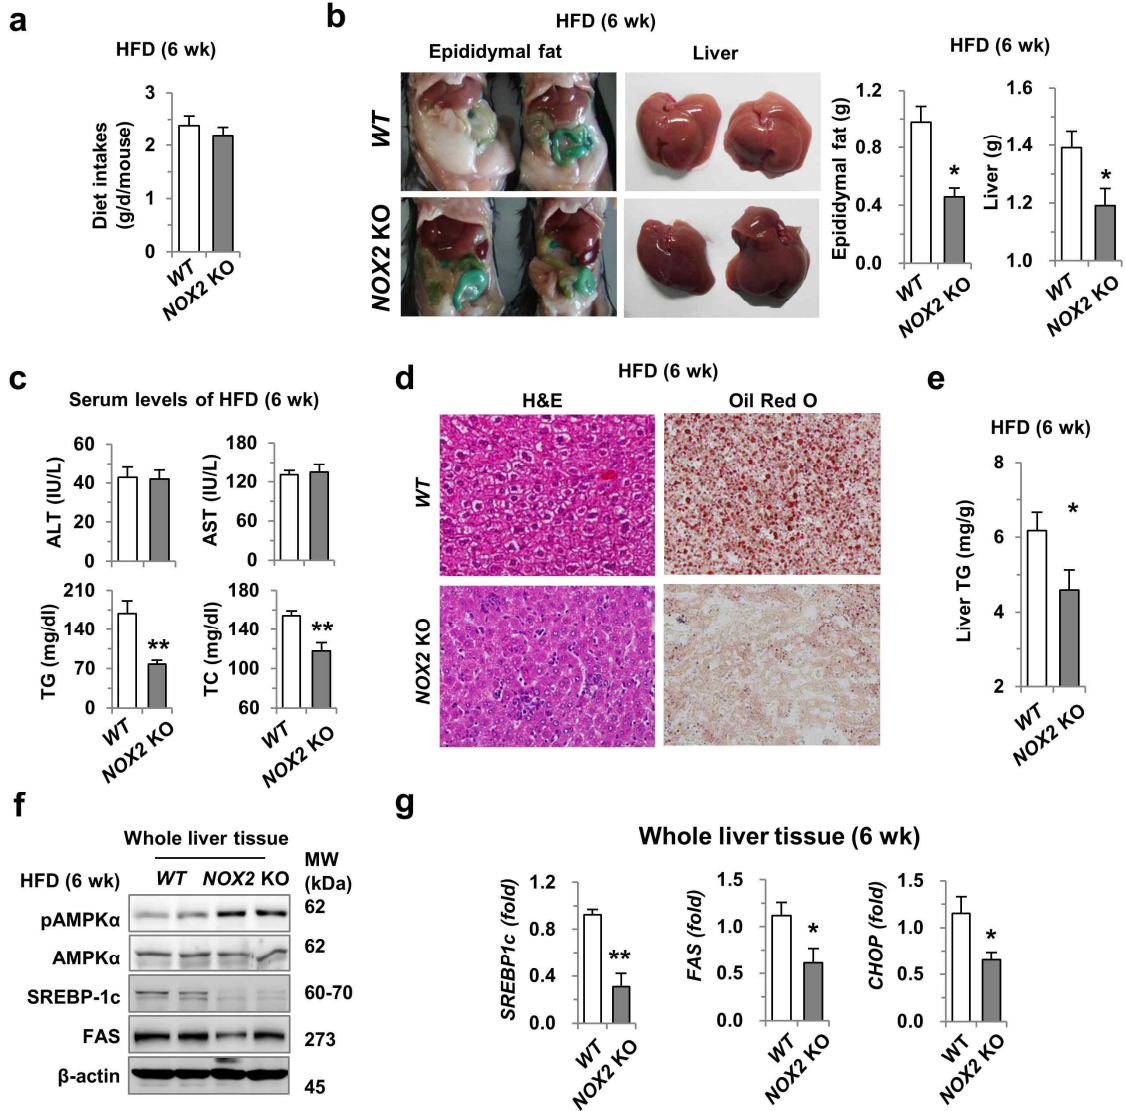

**Supplementary Figure 1 | Depletion of NOX2 ameliorates high-fat diet-induced hepatic steatosis in mice.** Wild type (WT) and *Nox2* knockout (KO) mice are fed with high-fat diet for 6 weeks. (a) The amount of diet intakes. (b) The representative gross findings and their weights of epididymal fat and liver in WT and *Nox2* KO mice at week 6. (c) Blood chemistry analyses for ALT, AST, TG and TC. (d) Sectioned liver tissues are stained with H&E and Oil-Red O (×400). (e) TG levels are measured in whole liver tissues. (f) Liver tissues are subjected to Western blotting. (g) Real-time PCR analyses of whole liver tissues. Data are representative of three independent experiments using 5 mice per group. Data are expressed as the mean ± s.e.m. and analyzed by Student's *t*-test, \**P* < 0.05, \*\**P* < 0.01 in comparison with the corresponding controls.

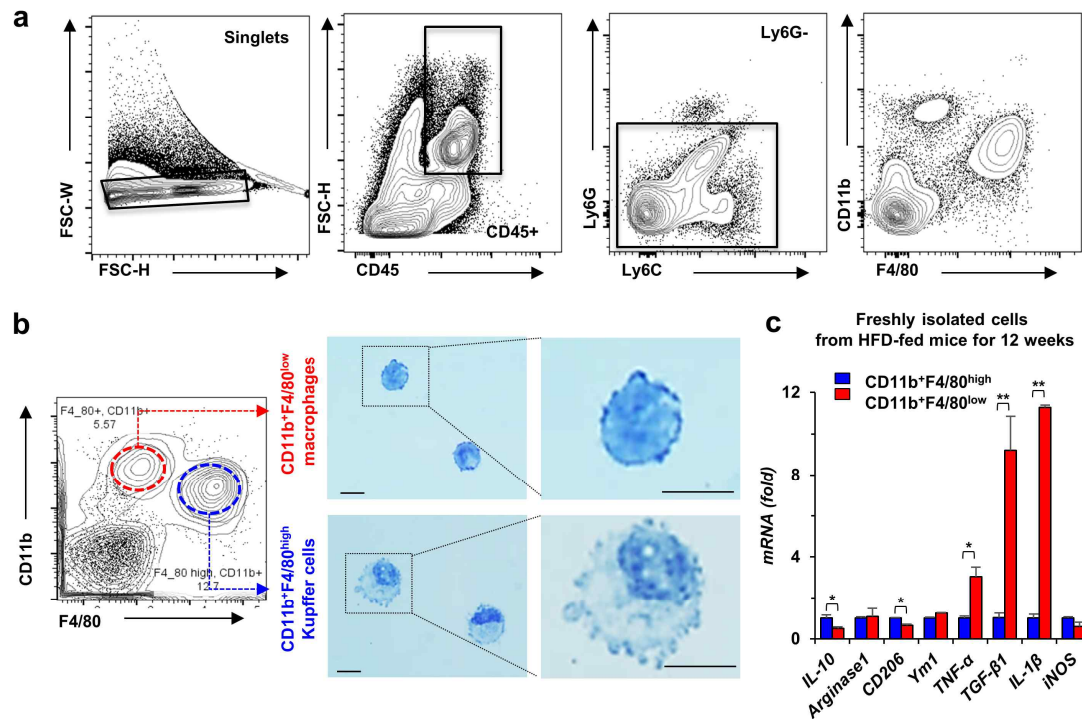

**Supplementary Figure 2 | CD11b<sup>+</sup>F4/80<sup>low</sup> macrophages present more pro-inflammatory phenotype than CD11b<sup>+</sup>F4/80<sup>high</sup> Kupffer cells in mouse liver.** (a) Flow cytometry analysis of freshly isolated liver mononuclear cells (MNCs). After gating singlet, CD45<sup>+</sup> cells were analyzed with antibodies of Ly6G and Ly6C. Then, CD45<sup>+</sup>Ly6C<sup>+</sup>Ly6G<sup>-</sup> cells are further analyzed with monocyte lineage markers F4/80 and CD11b. (b) CD11b<sup>+</sup>F4/80<sup>high</sup> Kupffer cells and CD11b<sup>+</sup>F4/80<sup>low</sup> macrophages were isolated individually. Isolated cells were visualized by Giemsa staining. Bar = 10  $\mu$ m. (c) The gene expression of Kupffer cells and macrophages were assessed by qRT-PCR. (c) Relative expression of pro-inflammatory (M1) and alternative (M2) marker genes in Kupffer cells and macrophages isolated from mouse liver fed with high fat diet for 12 weeks. Data are representative of three independent experiments using isolated liver immune cells from 3 (a,b) and 5 (c) mice per group. Data are expressed as the mean  $\pm$  s.e.m. and analyzed by Student's *t*-test, \**P* < 0.05, \*\**P* < 0.01 in comparison with the corresponding controls.

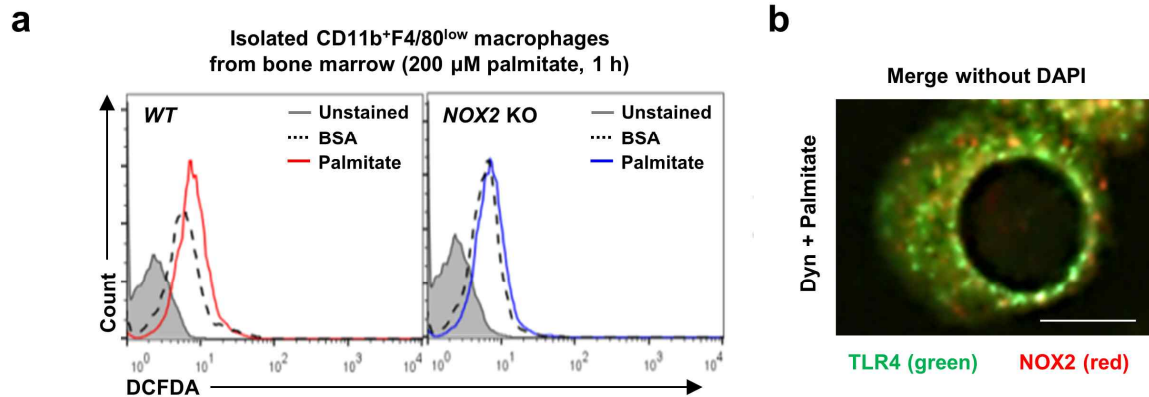

**Supplementary Figure 3 | Palmitate treatment increases ROS generation in CD11b<sup>+</sup>F4/80<sup>low</sup> macrophages by TLR4 and endocytosis-dependent manners.** (a) Palmitate-mediated generation of reactive oxygen species (ROS) was monitored by DCF fluorescence in bone marrow-derived CD11b<sup>+</sup>F4/80<sup>low</sup> macrophages of *WT* and *Nox2* KO mice. (b) RAW 264.7 macrophages were treated with palmitate (200  $\mu$ M)  $\pm$  dynasore (80  $\mu$ M) for 1 hour. Then, these cells were subjected to immunostaining with antibodies of TLR4 and NOX2. Bar = 50  $\mu$ m. Data are representative of three independent experiments *in vitro* using isolated liver immune cells from 3 (a-c) mice per group. Data are expressed as the mean  $\pm$  s.e.m. and analyzed by Student's *t*-test, \**P* < 0.05, \*\**P* < 0.01 in comparison with the corresponding controls.

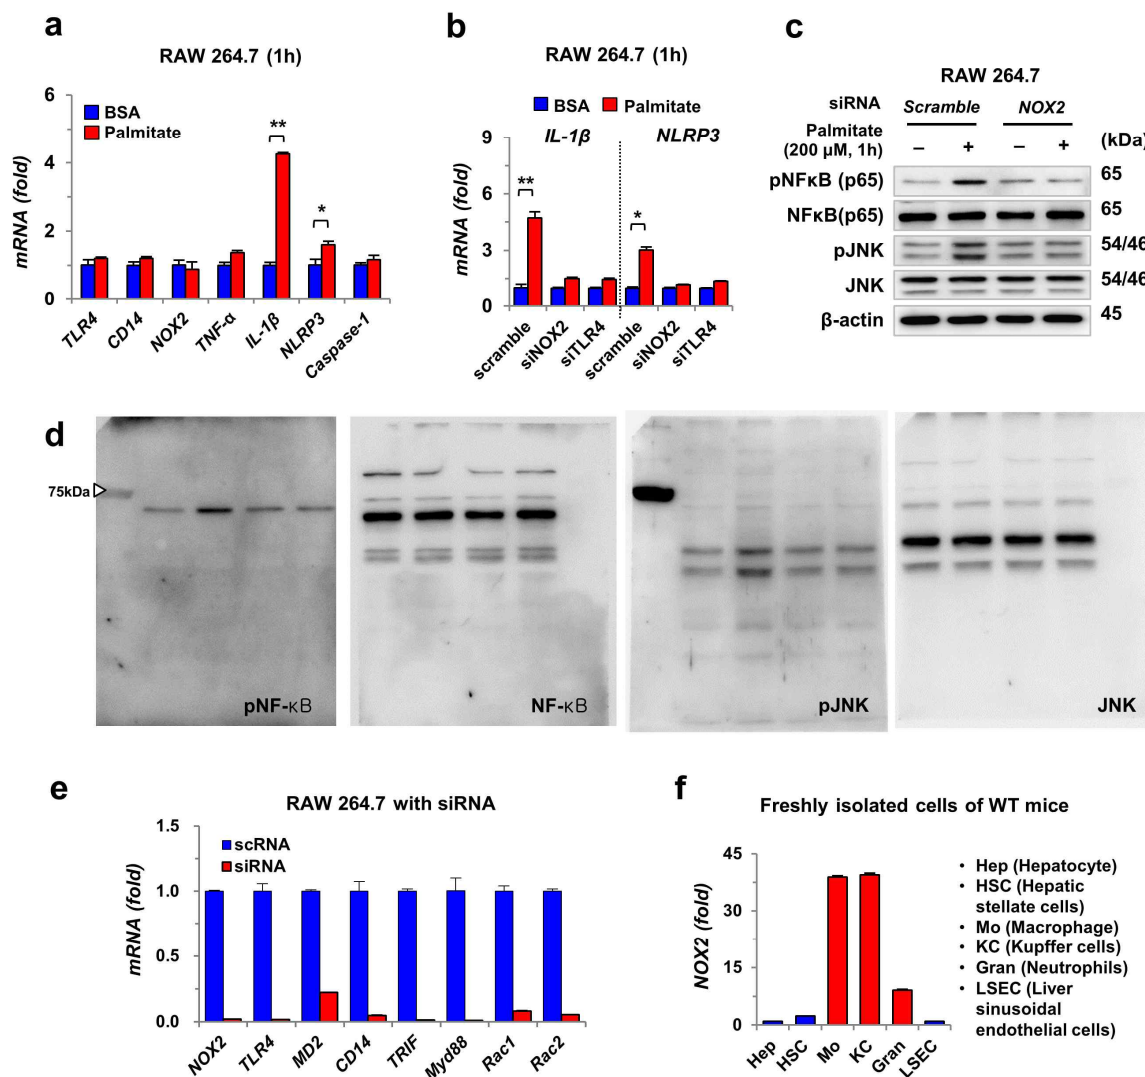

**Supplementary Figure 4 | Endocytosis of palmitate/TLR4-MD2 complex generates NOX2-mediated ROS by MyD88- and TRIF-independent manners.** Raw 264.7 cells were stimulated with 200  $\mu$ M palmitate for 1 hour. (a) RAW 264.7 cells treated with palmitate were subjected to qRT-PCR analyses. (b-d) After siRNA silencing and palmitate treatment, RAW 264.7 cells were subjected to qRT-PCR analyses (b) and Western blotting (c,d), respectively. (e) After siRNA silencing for *Nox2*, *Tlr4*, *Md2*, *Cd14*, *Trif*, *Myd88*, *Rac1* and *Rac2*, levels of mRNA were assessed. (f) *Nox2* expression was assessed in freshly isolated hepatic cells including hepatocytes, hepatic stellate cells, macrophages, Kupffer cells, neutrophils, and liver sinusoidal endothelial cells. Data are representative of three independent experiments. Data are expressed as the mean  $\pm$  s.e.m. and analyzed by Student's *t*-test, \**P* < 0.05, \*\**P* < 0.01 in comparison with the corresponding controls.

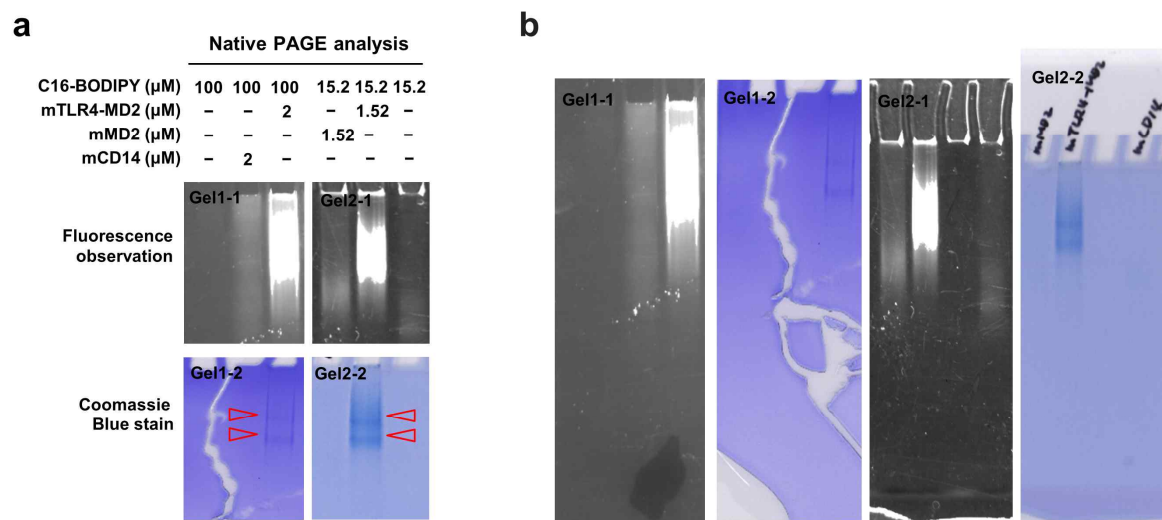

**Supplementary Figure 5 | Binding palmitate to the mouse TLR4-MD2 complex.** After the reaction between each protein and BODIPY-labeled fluorescent fatty acid analogue (C16-BODIPY) under the indicated conditions, the samples loaded onto Native gradient PAGE (4-15%) were visualized with illumination at 488 nm and Coomassie staining, respectively. Data are representative of three independent experiments.

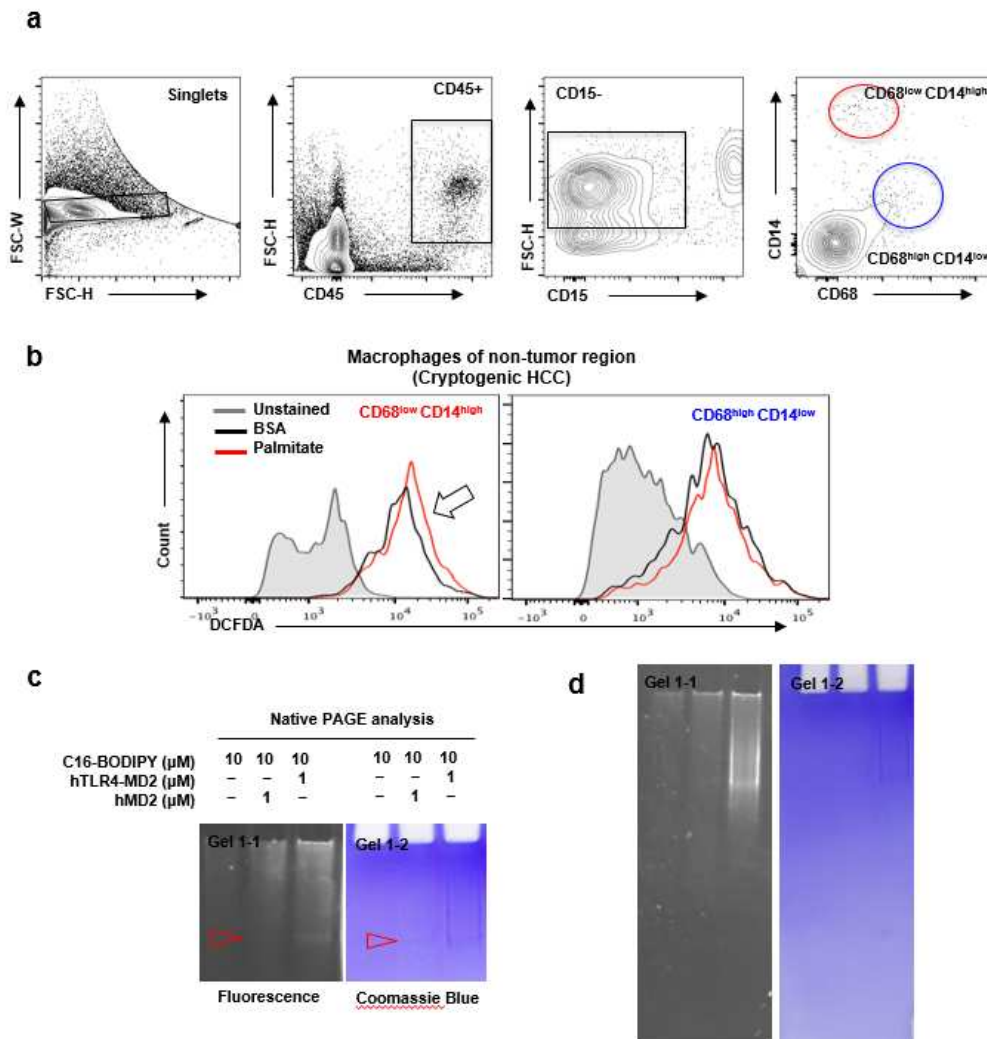

**Supplementary Figure 6 | Palmitate/TLR4-MD2 complex mediates NOX2-dependent ROS generation in non-resident hepatic macrophages in human.** (a) Isolated human liver MNCs were analyzed by flow cytometry. After gating singlet, CD45<sup>+</sup> cells were analyzed with antibody of CD15. Then, CD45<sup>+</sup>CD15<sup>-</sup> cells are further analyzed with monocyte lineage markers CD14 and CD68. (b) Isolated human liver MNCs from non-tumor lesions of primary hepatocellular carcinoma were treated with palmitate (200  $\mu$ M) for 1 hour and then subjected to ROS measurement. Data are derived from liver MNCs of a cryptogenic HCC ( $n = 1$ ) patient. (c) After the reaction between each protein and BODIPY-labeled fluorescent fatty acid analogue (C16-BODIPY) under the indicated conditions, the samples loaded at Native gradient PAGE (4-15%) were visualized with illumination (488 nm) and Coomassie staining.

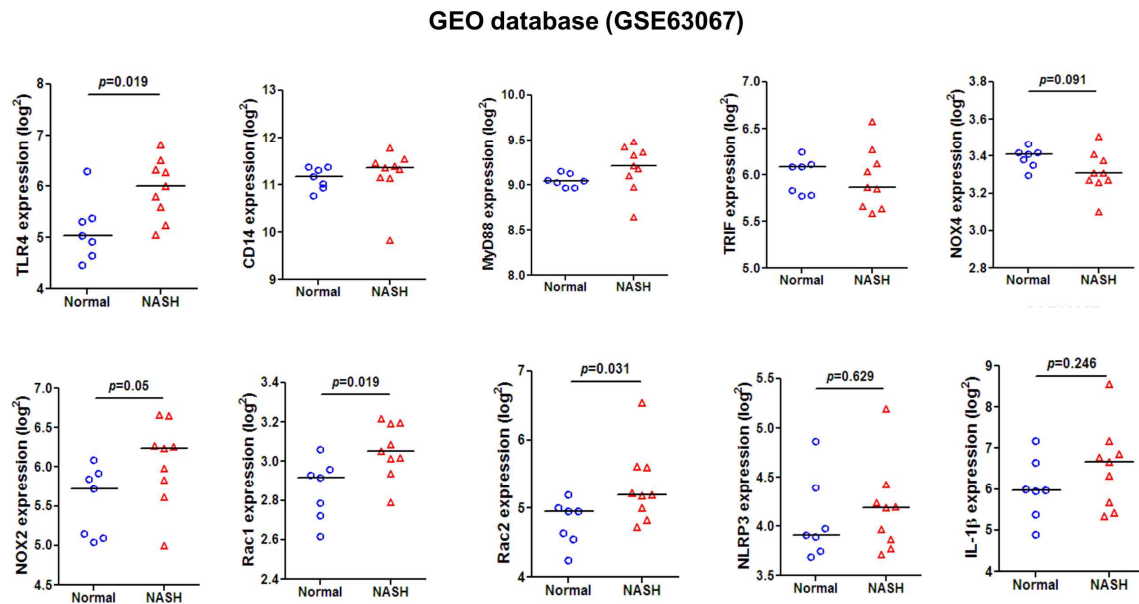

**Supplementary Figure 7 | Gene expression between healthy controls and NASH patients.**

Using GEO database (GSE63067), relative gene expression of *Tlr4*, *Cd14*, *Myd88*, *Trif*, *Nox4*, *Nox2*, *Rac1*, *Rac2*, *Nlrp3*, and *Il-1 β* was compared between healthy controls and patients with NASH. Data are expressed as the mean ± s.e.m. and analyzed by Student's *t*-test.

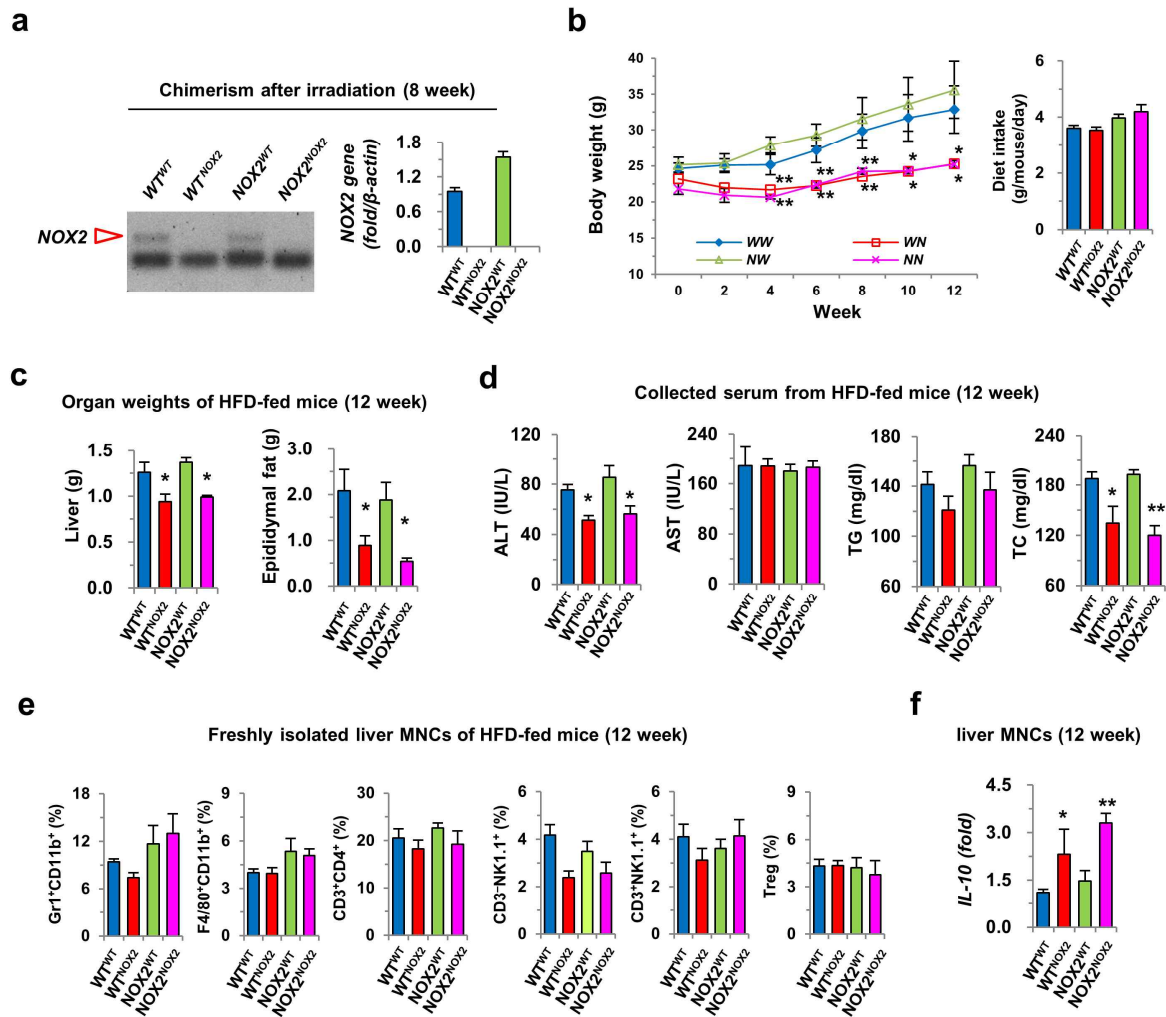

**Supplementary Figure 8 | NOX2-deficient bone marrow transplantation attenuates high-fat diet-induced hepatic steatosis in mice.** After reciprocal bone marrow transplantation between *WT* and *Nox2* KO mice, mice were fed with high-fat diet for 12 weeks. **(a)** Chimerism of liver MNCs were assessed by RT- and qRT-PCR analyses. **(b)** Changes of body weights and diet intakes were measured. **(c)** Organ weights of liver and epididymal fat were measured. **(d)** Levels of ALT, AST, TG and TC were measured in collected sera. **(e,f)** Freshly isolated liver MNCs were subjected to flow cytometry and qRT-PCR analyses. Data are representative of two independent experiments using 5 mice per group. Data are expressed as the mean  $\pm$  s.e.m. and analyzed by one-way analysis of variance, \* $P < 0.05$ , \*\* $P < 0.01$  in comparison with the corresponding controls.

**Supplementary Table 1. Oligonucleotide sequences of RNA used in siRNA transfection**

| Gene  | Sense               | Anti-sense          |
|-------|---------------------|---------------------|
| NOX2  | GAUCUUAUGUGCAUAGAU  | UAUCUAUGCACAUAGAUC  |
| NOX4  | UCAGACAAAGUAGACACU  | AGUGUCUACAUUUGUCUGA |
| TLR4  | GAAUUGUAUCGCCUUCUUA | UAAGAAGGCGAUACAAUUC |
| Rac1  | CAGUUCUACCUAGCAAGU  | ACUUGCUAAGUUAGAACUG |
| Rac2  | ACUAGUGUGUUCGCCAUGU | ACAUGGCGAACACACUAGU |
| MyD88 | CUCAACCCGUGUCAAUGA  | UCAUUGAACACGGGUUGAG |
| TRIF  | GCAUUCUAGGUGCCUUGGA | UCCAAGGCACCUAGAAUGC |
| MD2   | CUAUUCAUCAGUGUCAACU | AGUUGACACUGAUGAAUAG |
| CD14  | CCUCGUCAACGAAUCCUCU | AGAGGAUUCGUUGACGAGG |

**Supplementary Table 2. Primer information**

| Gene           | Forward (5'-3')           | Reverse (5'-3')         | Base pair |
|----------------|---------------------------|-------------------------|-----------|
| <b>Mouse</b>   |                           |                         |           |
| 18S            | ACAGGATTGACAGATTGATAGC    | GCCAGAGTCTCGTTCGTTA     | 114bp     |
| Arginase1      | CTCCAAGCCAAAGTCCTTAGAG    | AGGAGCTGTCATTAGGGACATC  | 185bp     |
| AP-2           | CCGACATCCGAAACTGTAAAAGT   | GCTTCCATGTGTCCAAAGTCA   | 184bp     |
| $\beta$ -actin | GTTACCAACTGGGACGAC        | CTCAAACATGATCTGGGTCA    | 150bp     |
| Caspase-1      | ACAAGGCACGGGACCTATG       | TCCCAGTCAGTCCTGGAAATG   | 237bp     |
| CB1R           | ACAGGGCAGTACCCCTTCTT      | AGCCCCTGGTGGTATTCTCT    | 175bp     |
| CD14           | CTCTGTCTTAAAGCGGCTTAC     | GTTGCGGAGGTTCAAGATGTT   | 191bp     |
| CD206          | CTCTGTTCAGCTATTGGACGC     | CGGAATTTCTGGGATTGAGCTTC | 132bp     |
| CHOP           | CTCCTGTCTGTCTCTCCGGAA     | TACCCTCAGTCCCCTCCTCA    | 100bp     |
| Clathrin       | AGATTCTGCCATTCGCTTTC      | TCAGTGCAATCACTTTGCTGG   | 240bp     |
| Dynamine2      | AAGAGCCGAGTTGAAGTGTG      | ACGACTGCTCAATGTCAATCAG  | 192bp     |
| FASN           | TGGGTTCTAGCCAGCAGAGT      | ACCACCAGAGACCGTTATGC    | 158bp     |
| IL-1 $\beta$   | GCCCATCCTCTGTGACTCAT      | AGGCCACAGGTATTTTGTCTG   | 191bp     |
| IL-6           | TCCATCCAGTTGCCTTCTTG      | TTCCACGATTTCCCAGAGAAC   | 166bp     |
| IL-10          | CGCAGCTCTAGGAGCATGTG      | GCTCTTACTGACTGGCATGAG   | 105bp     |
| iNOS           | GTTCTCAGCCCAACAATACAAGA   | GTGGACGGGTCGATGTCAC     | 127bp     |
| NLRP3          | ATTACCCGCCCCGAGAAAGG      | TCGCAGCAAAGATCCACACAG   | 141bp     |
| NOX2           | ACTCCTTGGGTCAGCACTGG      | GTTCTGTCCAGTTGTCTTCG    | 160bp     |
| SREBP1c        | CCTAACGTGGGCCTAGTCCGAAGCC | CCAGTTCGCACATCTCGGCCA   | 106bp     |
| TLR4           | AAATGCACTGAGCTTTAGTGGT    | TGGCACTCATAATGATGGCAC   | 104bp     |
| TGF- $\beta$ 1 | TTGCTTCAGCTCCACAGAGA      | TGGTTGTAGAGGGCAAGGAC    | 182bp     |
| TNF- $\alpha$  | AAGCCTGTAGCCACGTCGTA      | AAGGTACAACCCATCGGCTGG   | 140bp     |
| Ym1            | CAGGTCTGGCAATTCTTCTGAA    | GTCTTGCTCATGTGTGTAAGTGA | 197bp     |
| <b>Human</b>   |                           |                         |           |
| 18S            | ATCACCATTATGCAGAATCCACG   | GACCTGGCTGTATTTTCCATCC  | 93bp      |
| $\beta$ -actin | AGCGAGCATCCCCCAAAGTT      | GGGCACGAAGGCTCATCATT    | 285bp     |
| CD14           | ACTCCCTCAATCTGTCGTTCTG    | TCCCGTCCAGTGTGAGTTAT    | 150bp     |
| IL-1 $\beta$   | GGGACAGGATATGGAGCAACA     | TTTCAACACGCAGGACAGGTA   | 127bp     |
| NLRP3          | CAGCCACCTCACTTCCAGTTT     | CCCCAACCACAATCTCCGAAT   | 169bp     |
| NOX2           | ACACCCTTCGCATCCATTCTC     | GCAAACCACTCAAAGGCATGT   | 125bp     |
| Rac1           | CGCAAACAGTTGGAGAAACGT     | ATCGGCAATCGGCTTGTCTTT   | 68bp      |
| Rac2           | TCTCATCAGCTACACCACCAAC    | GACGAGGGAGAAGCAGATGAG   | 199bp     |
| TLR4           | GGTCTCAGTGTGCTTGTAGT      | TTCCTTACCCAGTCCTCATCCT  | 159bp     |
| TNF- $\alpha$  | TGGCGTGGAGCTGAGAGATAA     | TTGATGGCAGAGAGGAGGTTGA  | 177bp     |
